# Supplementary material for: Function of Thelenota ananas saponin desulfated holothurin A in modulating cholesterol metabolism
Source: PubMed Central journal article supplement (PMC6014995; doi:10.1038/s41598-018-27932-x), 2018-06-22
Supplement: 41598_2018_27932_MOESM1_ESM.pdf [file 41598_2018_27932_MOESM1_ESM.pdf]

1           Function of *Thelenota ananas* saponin desulfated holothurin A in  
2                                           modulating cholesterol metabolism

3           Qi-an Han <sup>1</sup>, Kaifeng Li <sup>1</sup>, Xiuping Dong <sup>2</sup>, Yongkang Luo <sup>1\*</sup>, Beiwei Zhu <sup>1,2\*</sup>

4       <sup>1</sup> Beijing Advanced Innovation Center for Food Nutrition and Human Health, College  
5       of Food Science and Nutritional Engineering, China Agricultural University, Beijing  
6       100083, China

7       <sup>2</sup> School of Food Science and Technology, Dalian Polytechnic University, National  
8       Engineering Research Center of Seafood, Dalian 116034, China

9       Corresponding author:

10      Beiwei Zhu, Email: zhubeiwei@163.com, Tel.: +86(411)86323262, Fax:  
11      +86(411)86323262;

12      Yongkang Luo, Email: [luoyongkang@263.net](mailto:luoyongkang@263.net), Tel.: +86(10)62737385, Fax:  
13      +86(10)62737385

14

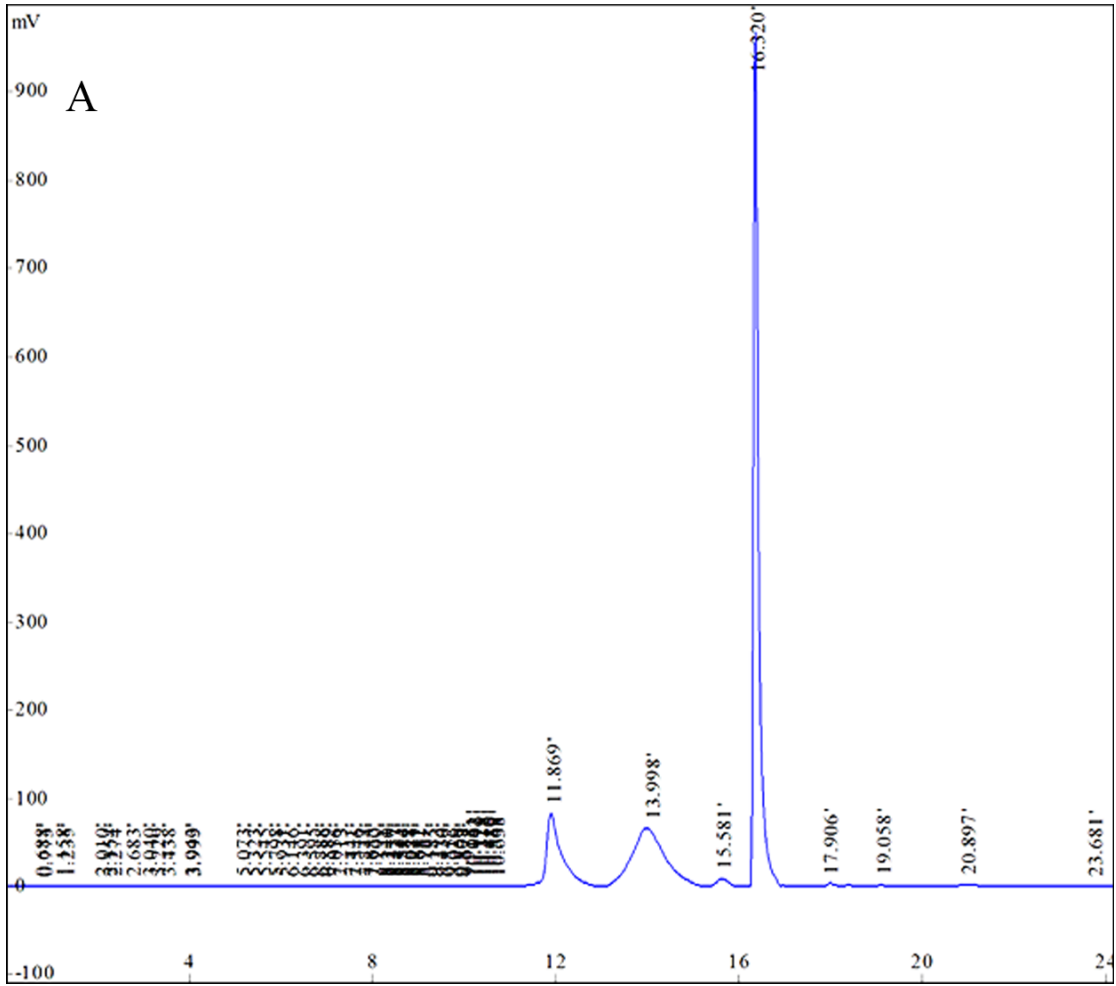

15

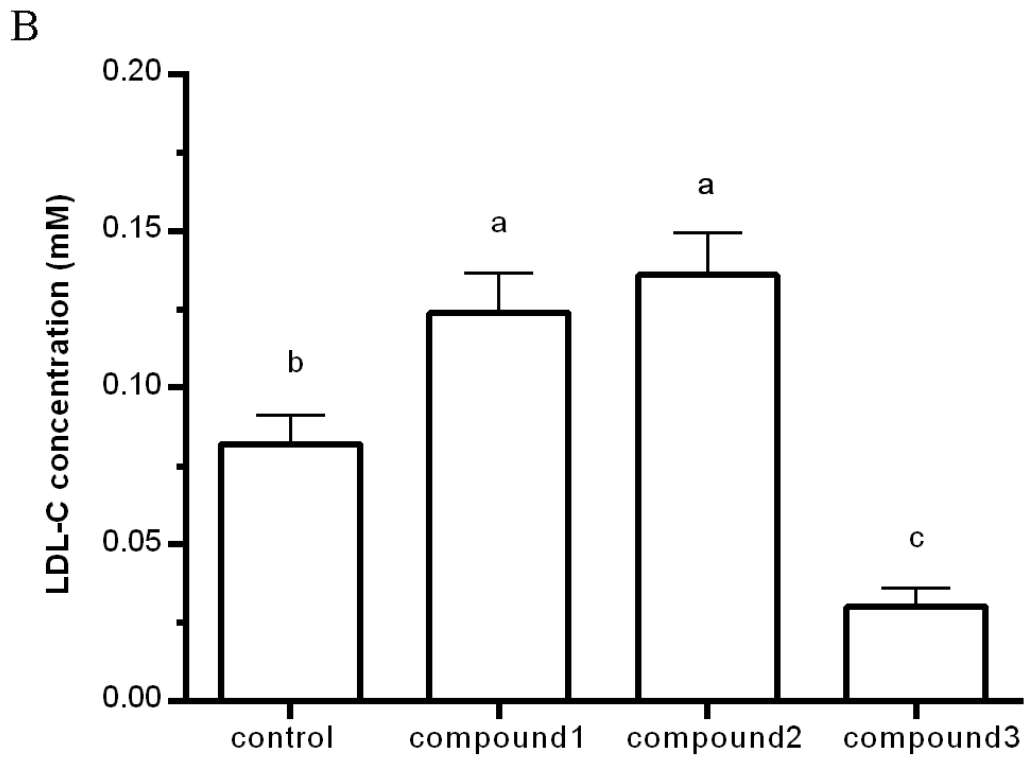

16

17 Figure S1. The purification, anti-cholesterol activity of the saponin from *Thelenota*  
18 *ananas*. (A) The semi-preparative HPLC chromatogram of the purified saponins. (B)  
19 The anti-cholesterol activity of the compounds separated by semi-preparative HPLC.  
20

21 **Original full-length blots**

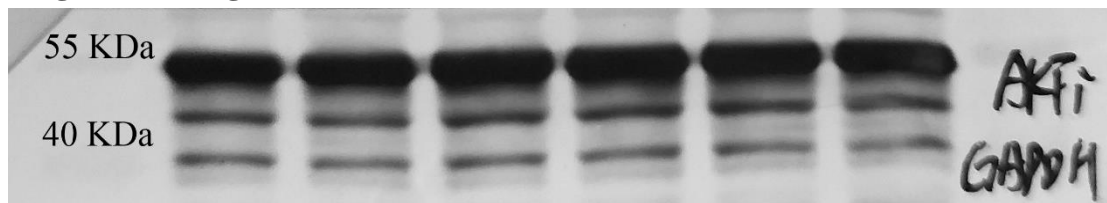

22

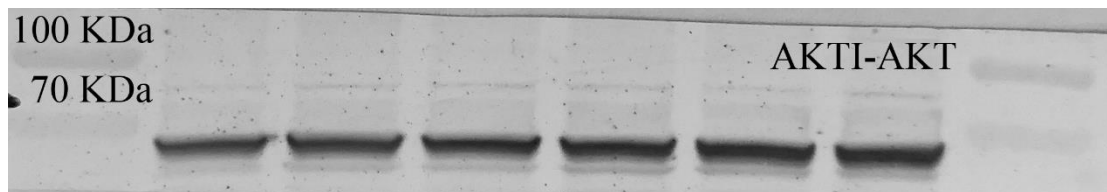

23

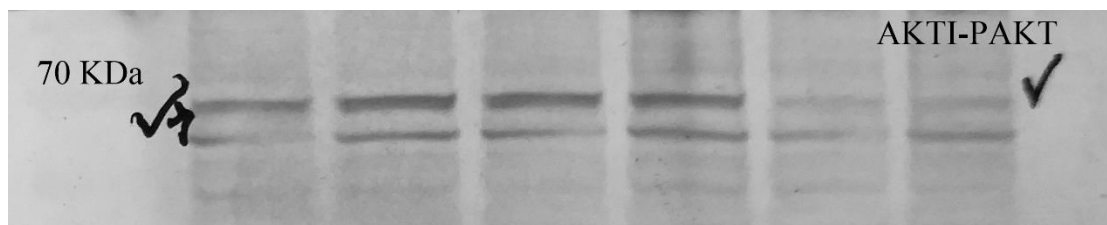

24

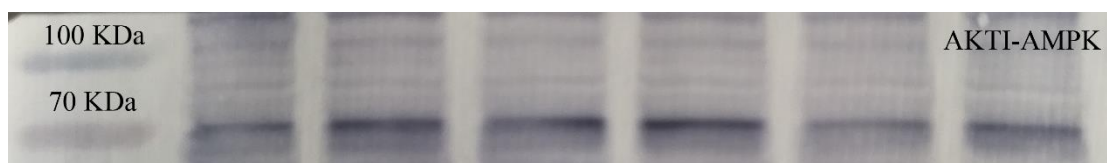

25

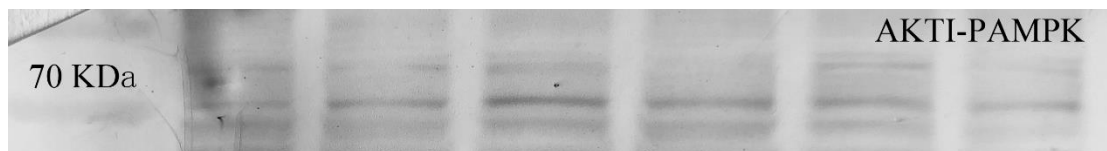

26

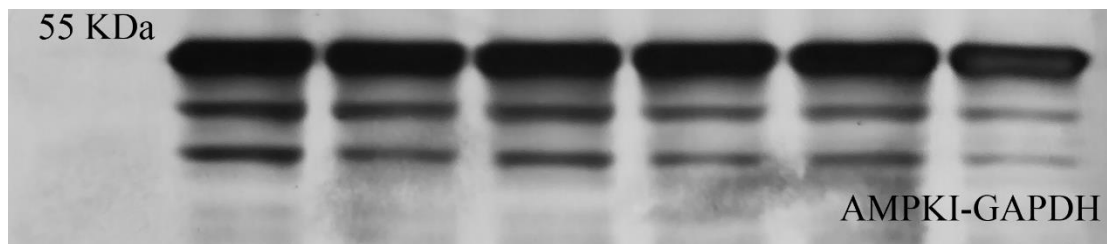

27

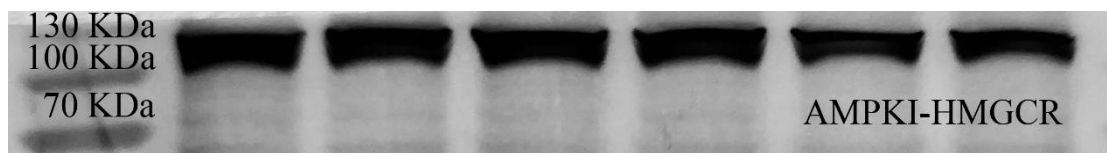

28

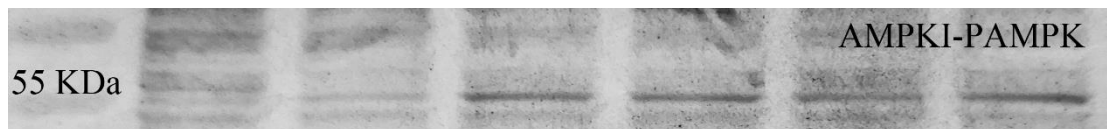

29

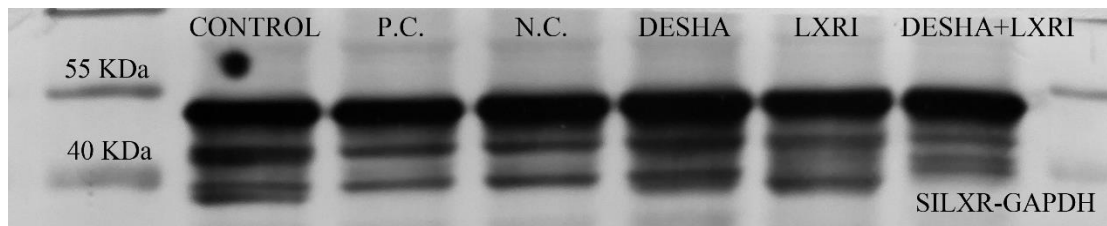

30

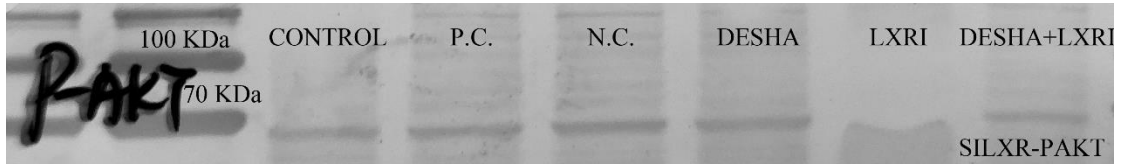

31
